# Supplementary material
Source: PubMed Central journal article supplement (PMC6728673)
Supplement: DS_10.1177_0022034517712435.pdf [file DS_10.1177_0022034517712435.pdf]

# STAT3 Induces Immunosuppression by Upregulating PD-1/PD-L1 in HNSCC

L.L. Bu, G.T. Yu, L. Wu, L. Mao, W.W. Deng, J.F. Liu, A.B. Kulkarni, W.F. Zhang, L. Zhang, and Z.J. Sun

## Appendix

**Appendix Figure 1. The Cutoff Finder was used to determine cutoff points in protein expression data**

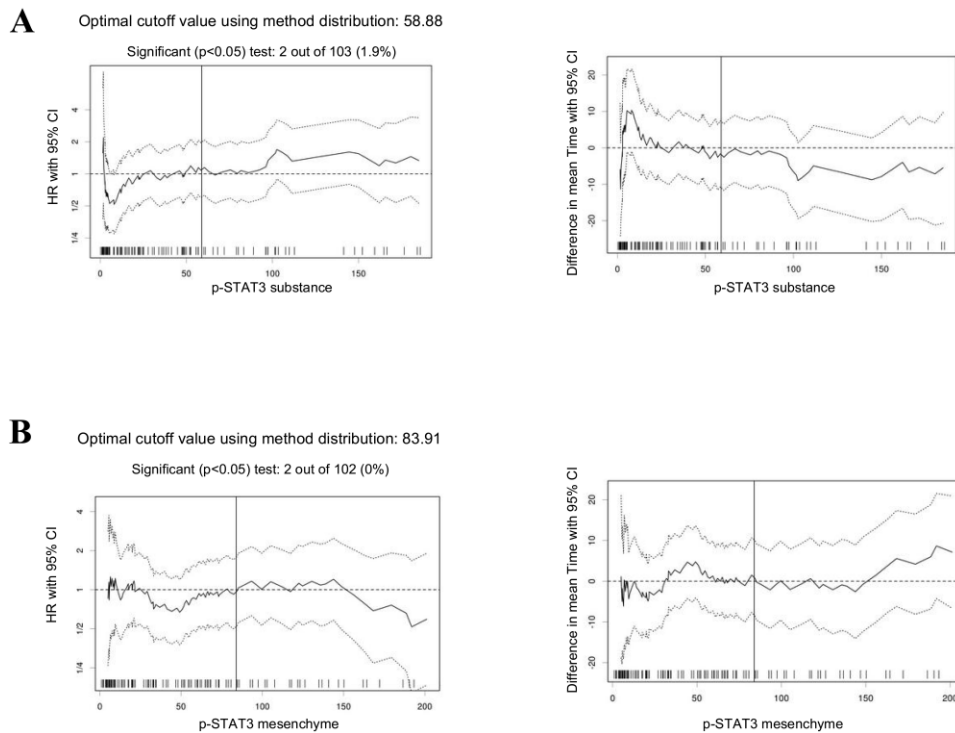

**Appendix Figure 1.** The Cutoff Finder was used to determine cutoff points in protein expression data. **(A)** Cutoff point optimization for p-STAT3 (epithelia) expression in HNSCC patients. **(B)** Cutoff point optimization for p-STAT3 (mesenchyme) expression in HNSCC patients.

**Appendix Figure 2.** The survival analysis of p-STAT3 (substance or mesenchyme) in HNSCC patients.

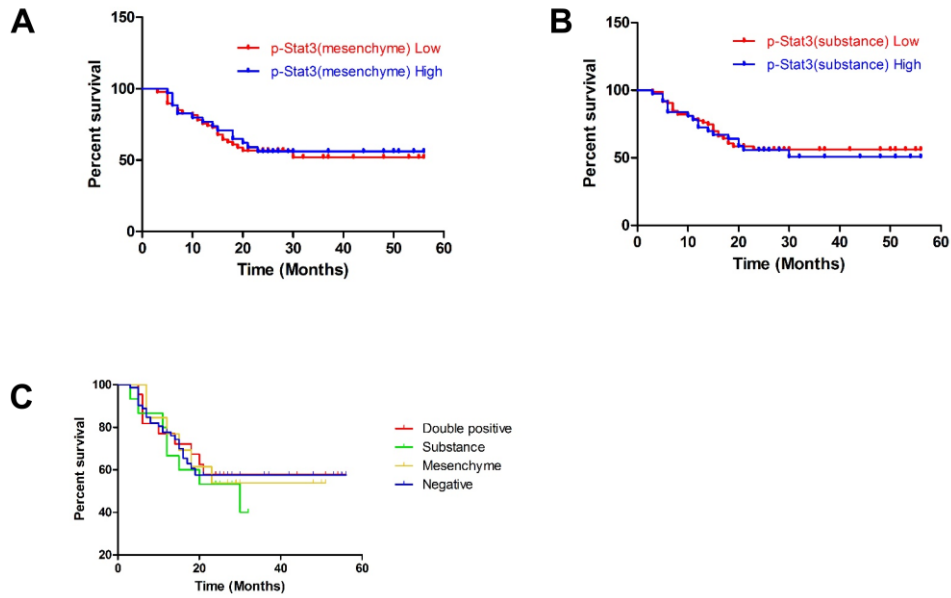

**Appendix Figure 2.** The survival analysis of p-STAT3 (epithelia or mesenchyme) in HNSCC patients.
